# Supplementary material for: Regulation of mouse steroidogenesis by WHISTLE and JMJD1C through histone methylation balance
Source: PubMed Central journal article supplement — Nucleic Acids Res. 2010 Jun 8;38(19):6389–403. doi: 10.1093/nar/gkq491 (PMC2965226; doi:10.1093/nar/gkq491), 2010-06-08
Supplement: supp_gkq491_Kim_et_al-NAR-00649-M-2010-Supplementary_information.pdf [file supp_gkq491_Kim_et_al-NAR-00649-M-2010-Supplementary_information.pdf]

## ***SUPPLEMENTARY INFORMATION***

---

### **Regulation of mouse steroidogenesis by WHISTLE and JMJD1C through histone methylation balance**

**Sung-Mi Kim<sup>1,6</sup>, Ji-Young Kim<sup>1,6</sup>, Nak-Won Choe<sup>2</sup>, Ick-Hyun Cho<sup>3</sup>, Ju-Ryoung Kim<sup>2</sup>, Dong-Wook Kim<sup>1</sup>, Jin-Ee Seol<sup>1</sup>, Song Eun Lee<sup>5</sup>, Hoon Kook<sup>4</sup>, Kwang-Il Nam<sup>5</sup>, Hyun Kook<sup>2</sup>, Young-Yil Bhak<sup>3</sup> and Sang-Beom Seo<sup>1,\*</sup>**

\* To whom correspondence should be addressed. Tel.: + 82 2 822 3059; Fax: + 82 2 822 3059;  
E-mail: sangbs@cau.ac.kr

## Supplementary Table S1

| Protein        | MW (kDa) | Cellular Function                                                             |
|----------------|----------|-------------------------------------------------------------------------------|
| AHNAK          | 680      | keratinocyte plasma membrane-associated protein                               |
| JMJD1C         | 285      | Histone demethylase                                                           |
| Pumilio        | 110      | Regulator during early embryogenesis                                          |
| BCL6           | 95       | Transcriptional repressor during lymphocyte differentiation                   |
| HSP90 $\alpha$ | 90       | Cellular chaperone                                                            |
| Lamin A        | 70       | Fibrous proteins providing structural function and transcriptional regulation |
| DDX5           | 68       | RNA helicase                                                                  |
| Vimentin       | 57       | Lymphocyte adhesion and transcellular migration                               |
| NAP1L4         | 52       | Nucleosome assembly                                                           |
| hnRNP          | 42       | Nuclear RNA-binding proteins                                                  |
| TGIF5          | 35       | Homeobox protein                                                              |
| Histone H3     | 15       | Component of Histone octamer                                                  |
| Histone H2A    | 14       | Component of Histone octamer                                                  |

# Supplementary Figure S1

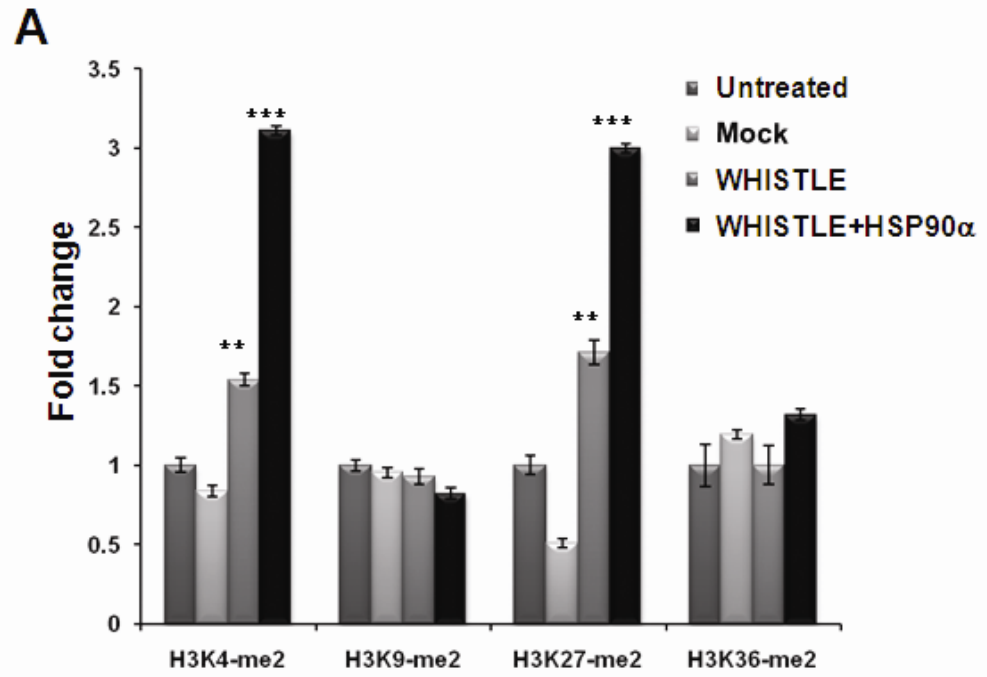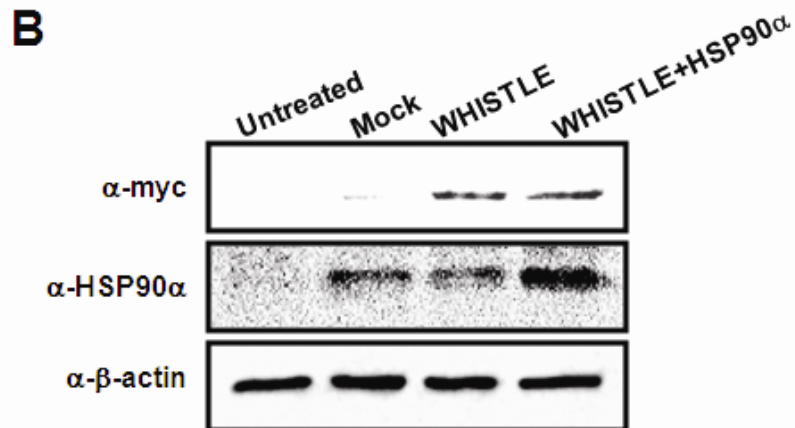

## Supplementary Figure S2

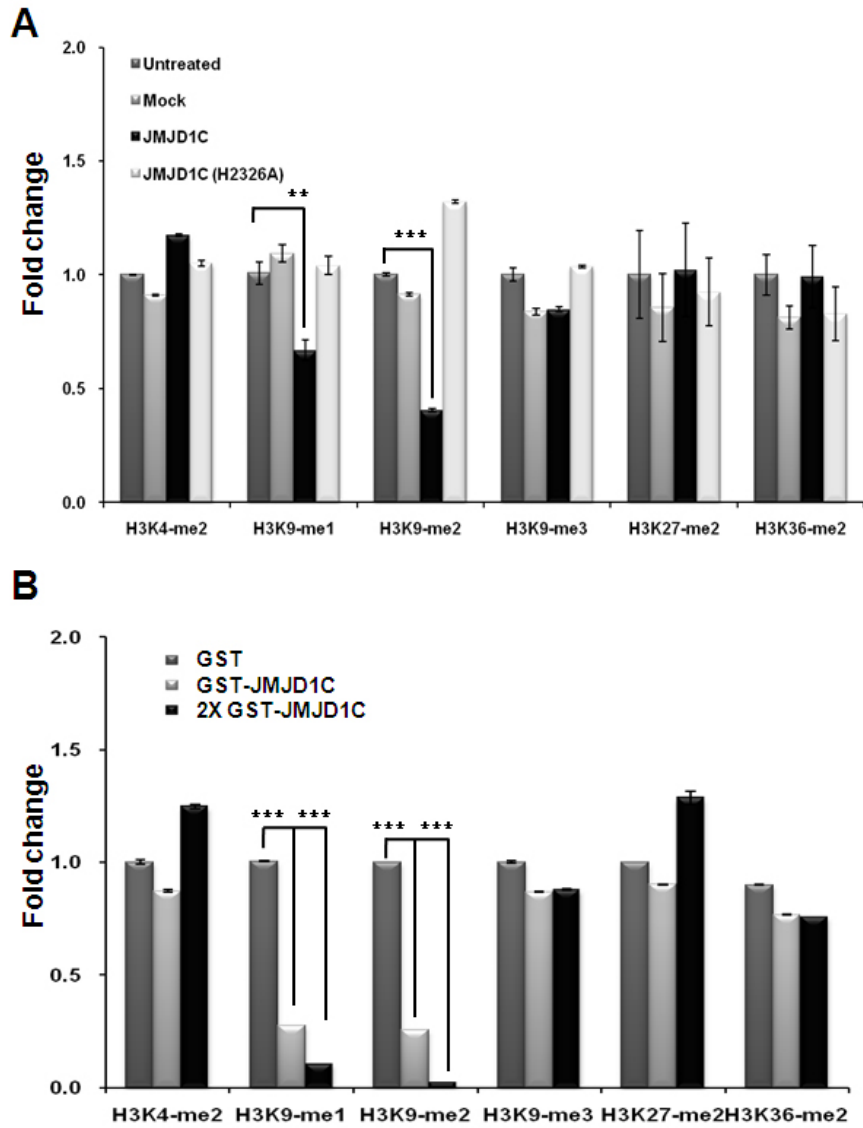

## Supplementary Figure S3

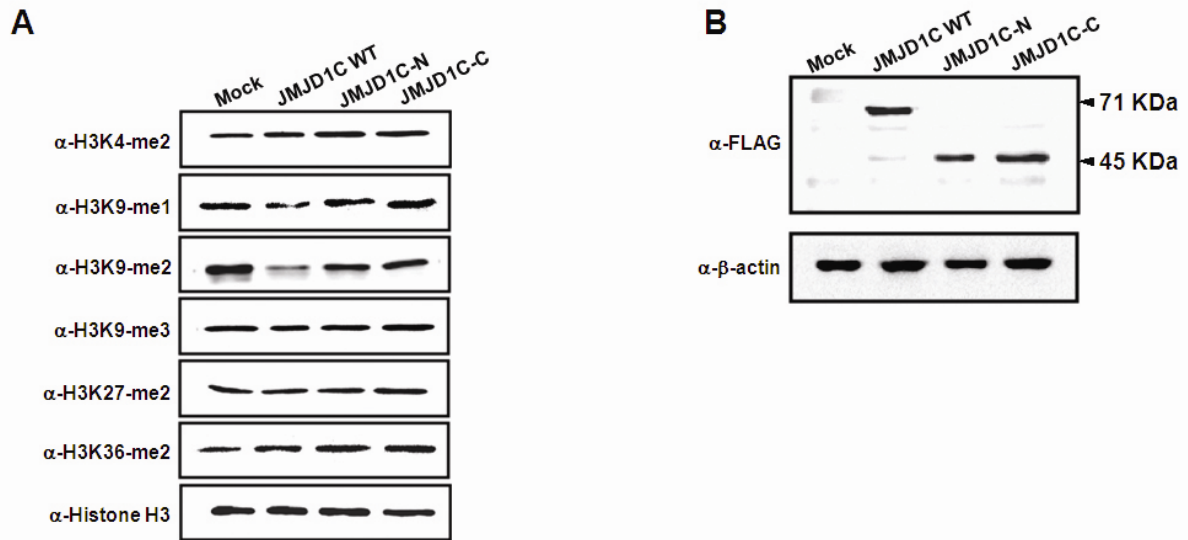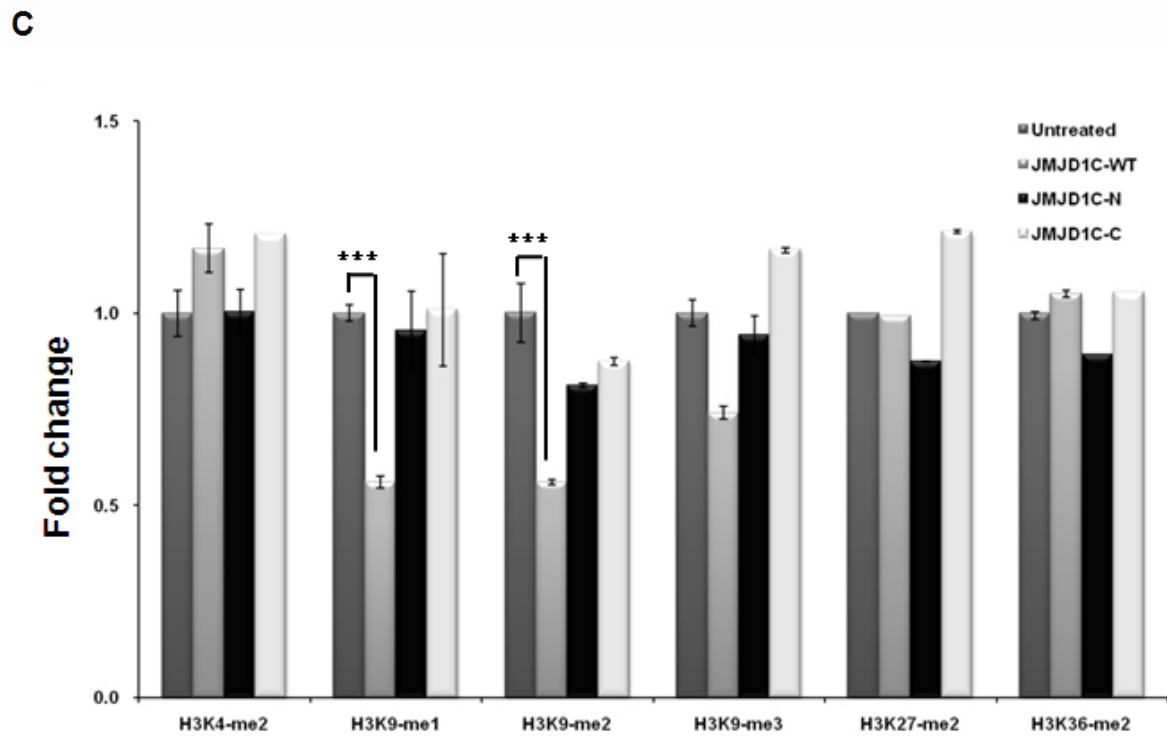

## Supplementary Figure S4

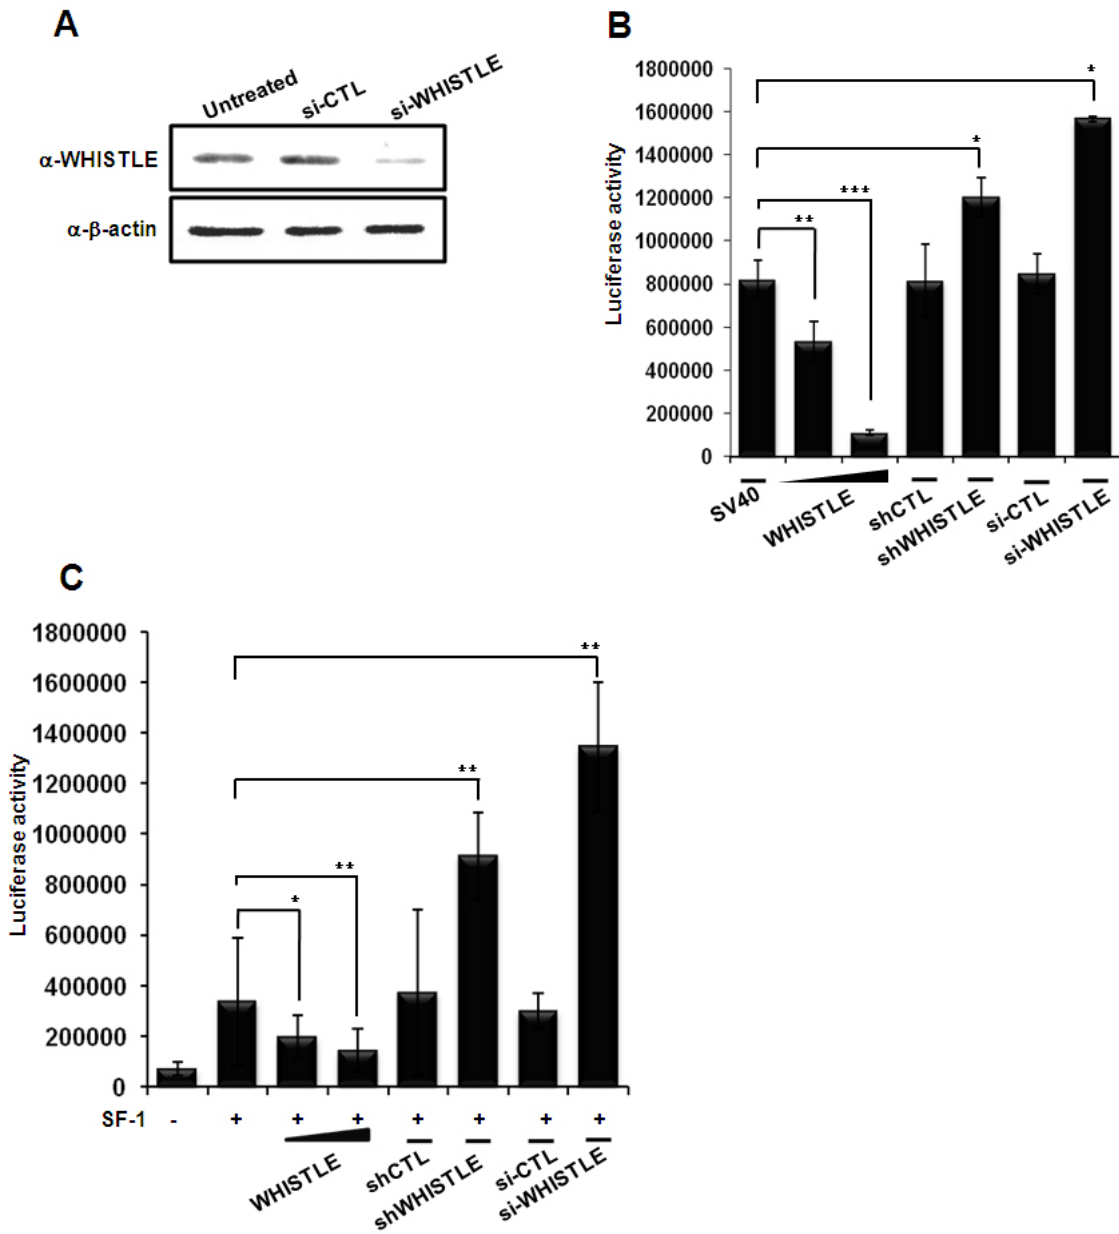

## Supplementary Figure S5

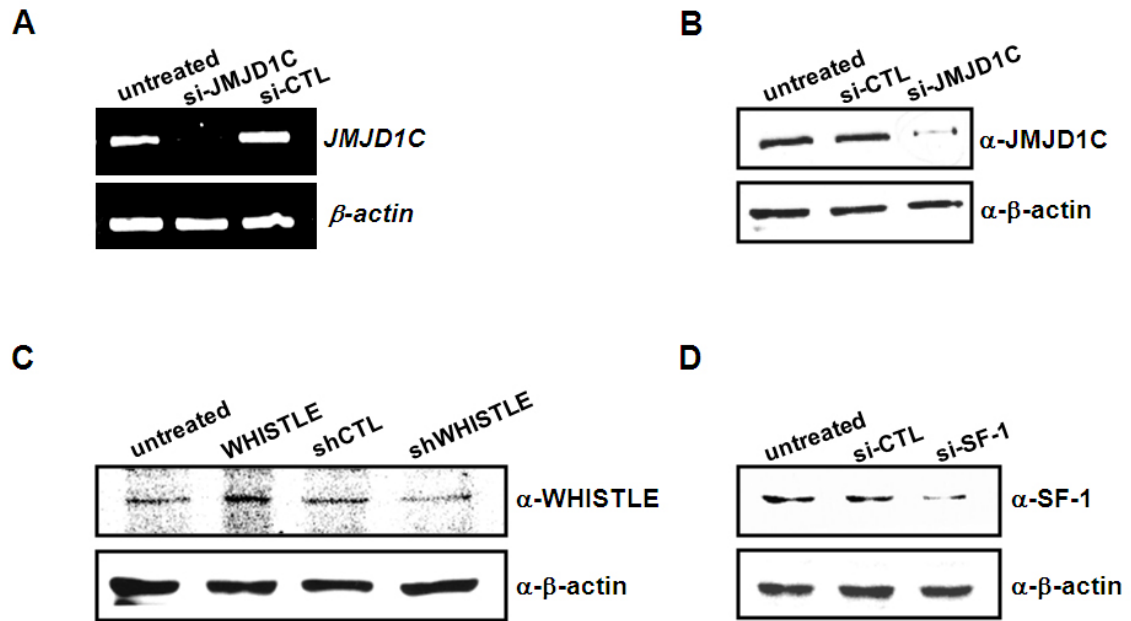

## Supplementary Table and Figures Legends

**Supplementary Table S1.** Identified proteins in TAP purification. The partial list of WHISTLE interacting proteins identified by affinity purification with TAP system and LC-MS/MS.

**Supplementary Figure S1.** (A) *In vivo* HMTase assay immunoblot images (Fig. 2A) were analyzed quantitatively in bar graph by Image J program. Data were expressed as a fold change (relative to histone H3) and presented as means  $\pm$  s.d of three independent experiments.  $**P < 0.01$  and  $***P < 0.001$ , compared with histone H3 control. (B) Immunoblot analysis of the levels of transfected WHISTLE and HSP90 $\alpha$  in NIH3T3 cells. Immunoblot analysis was performed using indicated antibodies.

**Supplementary Figure S2.** Quantification of demethylase activity of JMJD1C. (A) *In vivo* demethylase activities (Fig. 3B) were analyzed quantitatively in bar graph by Image J program. (B) *In vitro* demethylase activities (Fig. 3E) were analyzed quantitatively in bar graph by Image J program. Data were expressed as a fold change (relative to histone H3) and presented as means  $\pm$  s.d of three independent experiments.  $**P < 0.01$  and  $***P < 0.001$ , compared with histone H3 control.

**Supplementary Figure S3.** Demethylase activity with JMJD1C deletion mutants. (A) The deletion of the JmjC domain (JMJD1C-N) or ZF-like motif (JMJD1C-C) constructs were expressed in TM3 cells, and demethylation activities were analyzed via immunoblot analysis



using indicated antibodies. Anti-Histone H3 panel indicates the loading controls. **(B)** Immunoblot analysis of the expression levels of flag-JMJD1C WT, flag-JMJD1C-N and flag-JMJD1C-C. **(C)** Immunoblot images (Fig. S3A) were analyzed quantitatively in bar graph by Image J program. Data were expressed as a fold change (relative to Histone h3) and presented as means  $\pm$  s.d of three independent experiments.  $***P < 0.001$ , compared with histone H3 control.

**Supplementary Figure S4.** Regulatory effects of WHISTLE and si-WHISTLE on transcriptional activity of SF-1. **(A)** TM3 cells treated with si-WHISTLE were immunoblotted using anti-WHISTLE antibodies. **(B)** TM3 cells were transfected with pCMX-Gal4-SV40 and indicated DNA constructs and si-WHISTLE, and their cell extracts were assayed for luciferase activity. **(C)** TM3 cells were transfected with SF-1 and a three copy SF-1-RE-luc, and indicated DNA constructs and si-WHISTLE. All data are expressed as means  $\pm$  s.d.; n = 5.  $*P < 0.05$ ,  $**P < 0.01$  and  $***P < 0.001$ , compared with untreated control.

**Supplementary Figure S5.** Immunoblot analysis with protein expression levels. **(A)** RT-PCR analysis of si-CTL and si-JMJD1C treated TM3 cells. **(B)** TM3 cells treated with si-JMJD1C were immunoblotted using anti-JMJD1C antibodies. **(C)** Immunoblot analysis of the levels of WHISTLE, shWHISTLE and sh-CTL transfected TM3 cells were shown. **(D)** TM3 cells treated with si-SF-1 and si-CTL were immunoblotted using anti-SF-1 antibodies.

## **SUPPLEMENTARY MATERIALS AND METHODS**

**Plasmids** pFLAG-JMJD1C-C (ZF-like motif) and pFLAG-JMJD1C-N (JmjC domain) deletion mutant plasmids were generated by PCR-based strategy. The siRNA against mouse WHISTLE (M-060989-01-0010) was purchased from Dharmacon.

**Cell culture and transient transfections** TM3 cells were maintained in DMEM medium supplemented with 5% fetal bovine serum (FBS) and 0.05 % antibiotics at 37 °C in a 5 % CO<sub>2</sub> atmosphere. For transient transfection, TM3 cells were seeded in 60 mm dishes with 5 X 10<sup>5</sup> numbers and transfected with pFLAG-JMJD1C, pFLAG-JMJD1C-N and pFLAG-JMJD1C-C using polyethylenimine (PEI).

### **RT-PCR**

Total RNA samples from TM3 cells transfected with each indicated constructs and different mouse developmental stages were extracted by Trizol reagent (Invitrogen) according to the manufacturer's instruction. Total RNA (1 µg) was used to synthesize the cDNA. The cDNA synthesis was primed with oligo-dT primer (Fermentas) and quantified cDNA was applied in of *JMJD1C* mRNA expression pattern analysis. The primer sequences were as follows ; JMJD1C : sense 5'-GAGGACTTCAAGGCC-3' and antisense 5'-AATTAGGTGTCTTCC-3'.
